# Supplementary material for: Preoperative Evaluation of Refugee Children With Heart Disease
Source: PubMed Central journal article supplement — CJC Pediatr Congenit Heart Dis. 2022 Jun 17;1(5):226–8. doi: 10.1016/j.cjcpc.2022.05.004 (PMC10642100; doi:10.1016/j.cjcpc.2022.05.004), 2022-06-17
Supplement: mmc1.pdf [file mmc1.pdf]

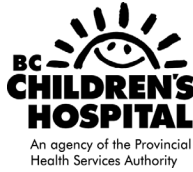

**Pre-operative Order set for Refugee Patients**  
**Cardiac Surgery- Preoperative Order Set for Patients New to Canada**  
**(Neonatal/Pediatric)**

**Weight:** \_\_\_\_\_ **kg**

**Height:** \_\_\_\_\_ **cm**

**Standard Labs:**

- CBC with differential
- Group and Screen
- Sodium
- Potassium
- Chloride
- Urea
- Creatinine
- Nasal Swab for Staph aureus
- Vitamin D
- Selenium
- Zinc
- Copper
- Magnesium
- Calcium
- Phosphorus
- Albumin
- Pre-Albumin
- Ferritin
- TSH
- Vitamin B12
- Liver Function Tests (Direct/Indirect Bilirubin, Alkaline phosphatase, AST, ALT, GGT)
- Syphilis (congenital)
- Sputum analysis or TB skin test (if exposure or suspected contact)
- Vitamin C
- Hepatitis Serology

**Diagnostic Imaging:**

- Chest x-ray 2 views (posterior and lateral)
- Ultrasound head
- Ultrasound kidney

**Other Investigations:**

- 12 lead ECG (If not done in the last 12 months)
- Echocardiogram

**Referrals:**

- Dentistry
